# Supplementary material for: IP3R mediated Ca2+ release regulates protein metabolism inDrosophilaneuroendocrine cells: implications for development under nutrient stress
Source: Oxford University Press journal article supplement (doi:10.1242/dev.145235), 2017-01-01
Supplement: dev145235supp.pdf [file dev145235supp.pdf]

## Figure S1

### UAS Controls

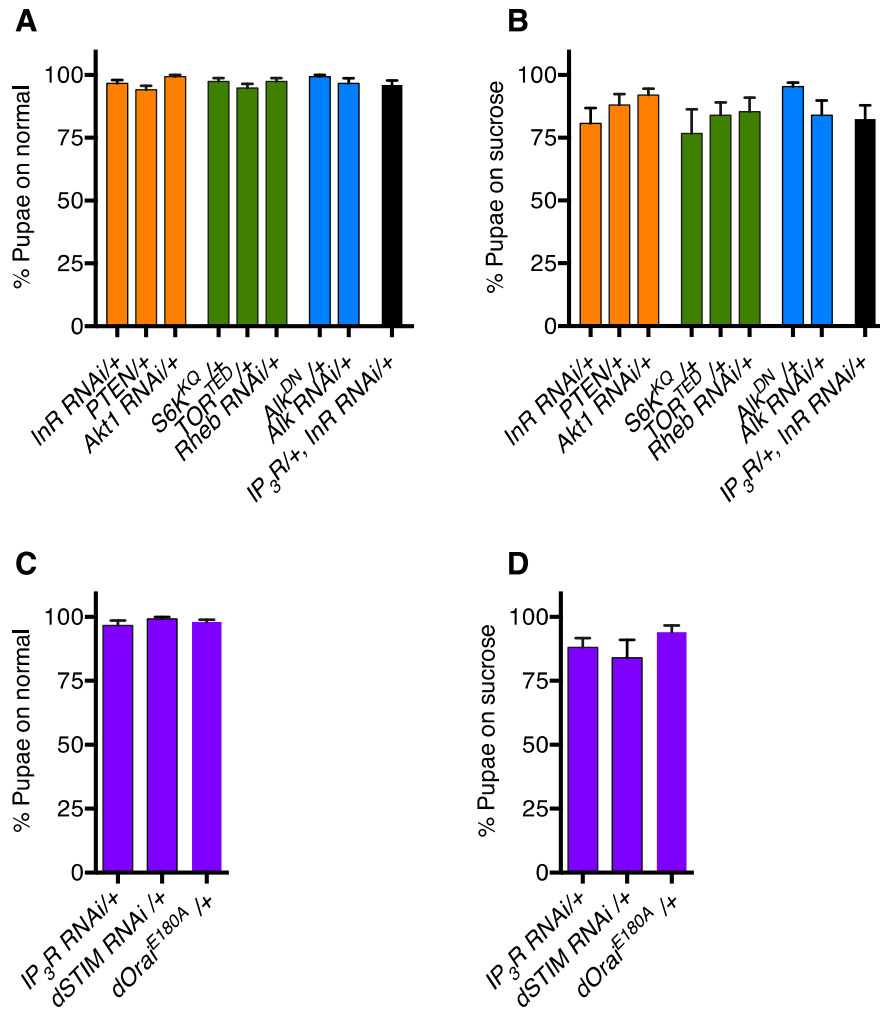

**Fig. S1A-D.** Pupation rate for controls. UAS lines used in Fig 1 were crossed to CS (+) and larvae were scored for pupation on normal or sucrose-only media. n=6 batches of 25 each.

Figure S2

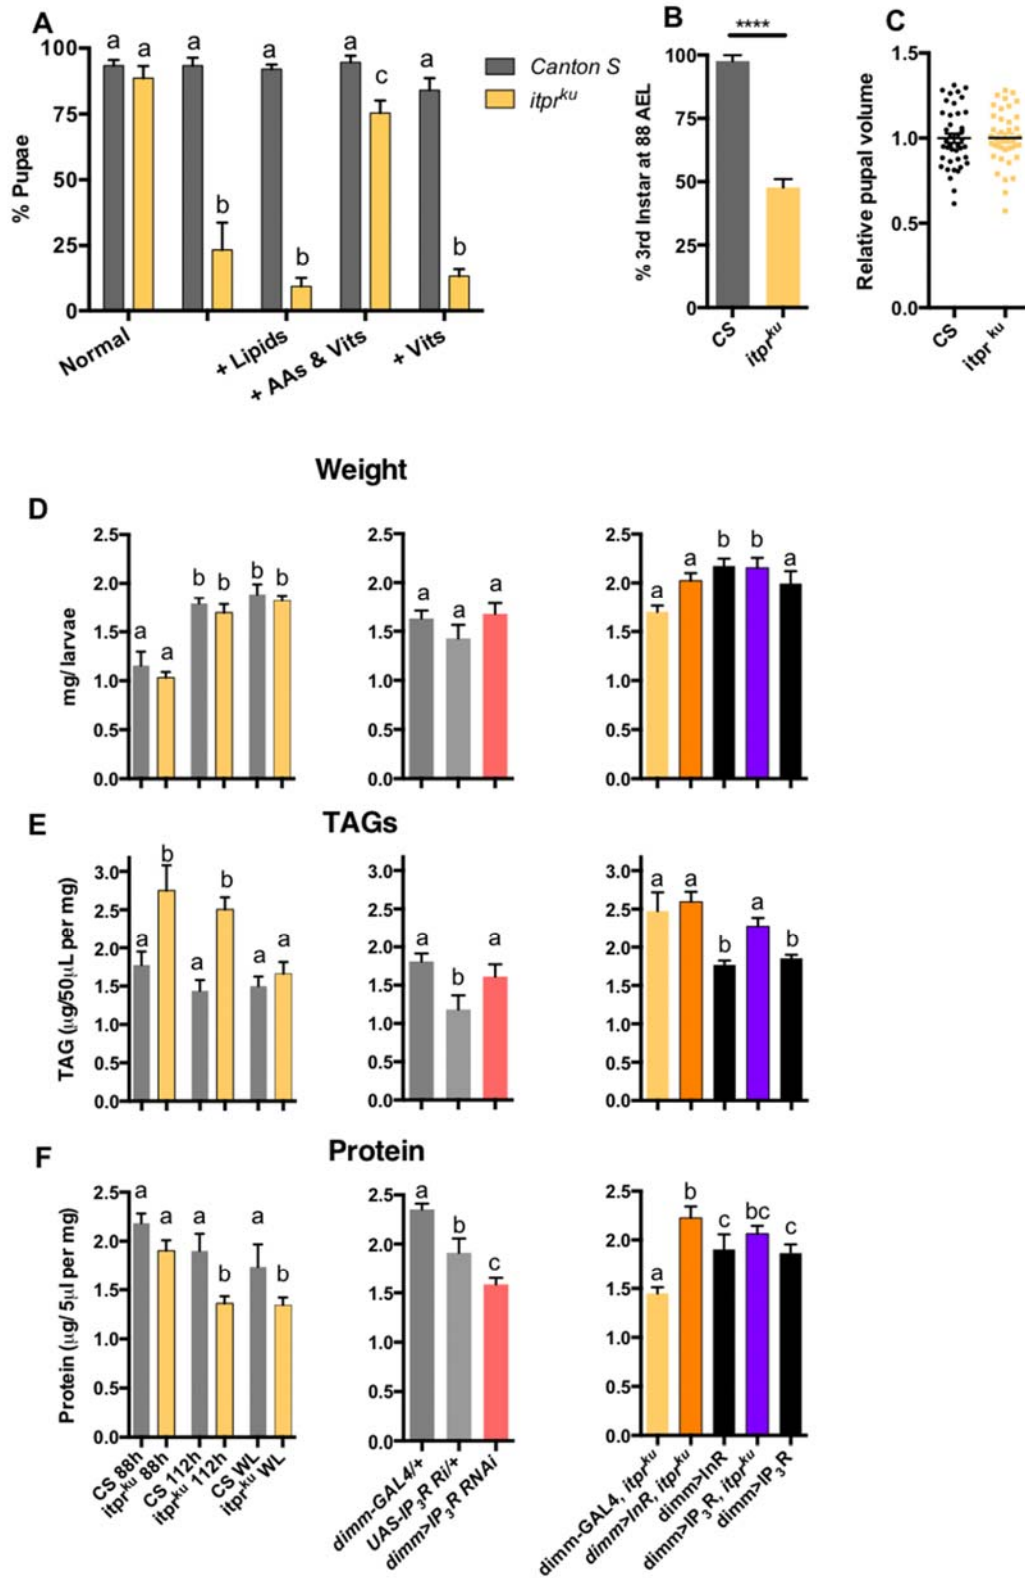

**Fig. S2 (A)** % pupation of 88h *itpr<sup>ku</sup>* larvae on normal food or 100mM sucrose with 1mM Total Brain Lipids (+ Lipids), 1X Grace's insect media (+ AAs & Vits) or 1X RPMI vitamin solution (+ Vits). n = 6 batches of 25 larvae, except + Vits where n = 3 batches of 25 larvae. Bars with the same alphabet represent statistically indistinguishable groups (2way ANOVA with Sidak's multiple comparisons p<0.05). **(B)** % of 3<sup>rd</sup> instar larvae recovered at 88h AEL. Note that in *itpr<sup>ku</sup>* there were only two populations of larvae: 2<sup>nd</sup> or 3<sup>rd</sup> instar. n ≥ 4 batches of > 50 larvae each. Unpaired *t* test \*\*\*\* p<0.0001 **(C)** Relative pupal volume . n=40. Unpaired *t* test was ns. **(D-F)** Weight, TAGs and protein levels of larvae. These values were used to compute protein/TAG ratios for Fig. 2D, 2E and 2H. For CS vs *itpr<sup>ku</sup>* measurements were made across three time points (n = 4 for 88h and WL; n = 8 for 112h). Note that the time of wandering larvae for CS and *itpr<sup>ku</sup>* are not the same as *itpr<sup>ku</sup>* delays pupation (Fig. 2B). For the rest of the genotypes, measurements were performed at 112h AEL (n≥8). Bars with the same alphabet represent statistically indistinguishable groups (one-way ANOVA with post hoc Tukey's test p<0.05).

Figure S3

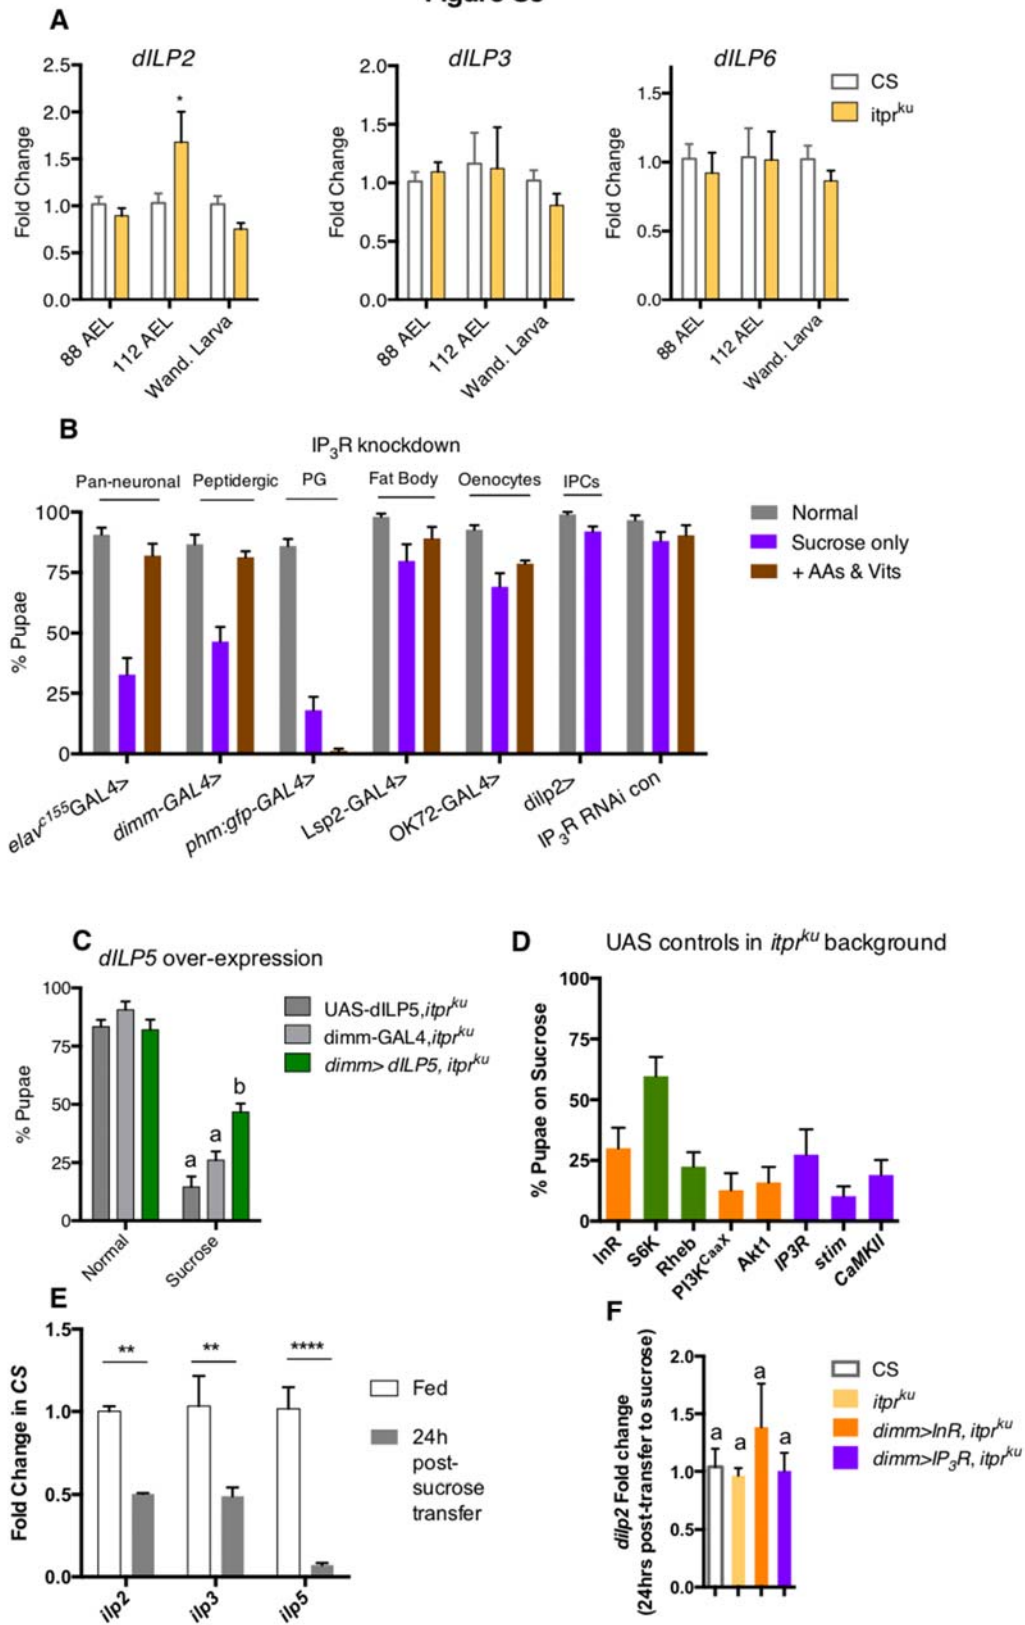

**Fig. S3 (A)** Transcript levels of various *dilps* in larval brains normalized to *rp49*. Unpaired *t* test was ns for each time point except *ilp2* at 112AEL \*  $p < 0.05$  **(B)** % pupae formed on normal, sucrose-only or AAs & Vits (1X Grace's insect media) by larvae with RNAi mediated knockdown of IP<sub>3</sub>R in various tissues and organs as indicated. Except for *dimm-GAL4*, all knockdowns were in the presence of *UAS-dicer*. IP<sub>3</sub>R RNAi control: *UAS-IP<sub>3</sub>R RNAi/+;UAS-dicer/+*. n=6 batches of 25 larvae, except for *OK72-GAL4* where n=4 batches of 25 larvae **(C)** % pupae formed on normal or sucrose-only media, by larvae with over-expression of *dILP5* in NE cells of *itpr<sup>ku</sup>*. **(D)** % pupae formed on sucrose-only media by UAS controls of various over-expressed molecules, in the background of *itpr<sup>ku</sup>*. Note that *UAS-S6K* was leaky, as it rescued *itpr<sup>ku</sup>* in the absence of the driver *dimm-GAL4*. n=6 batches of 25 larvae **(E)** *dILP 2,3* and *5* transcript in 88h AEL CS larvae starved for 24hours on sucrose-only media. n=3. Unpaired t-test \*\* $p < 0.01$ , \*\*\*\* $p < 0.0001$  **(F)** Relative transcript levels of *dILP2* relative to *rp49*, in 88h AEL 3<sup>rd</sup> instar larvae starved for 24h on sucrose-only media. n=4. Fold change normalized to *rp49*. Bars with the same alphabet represent statistically indistinguishable groups (one-way ANOVA with post hoc Tukey's test  $p < 0.05$ ).

**Figure S4**  
**Neurons**

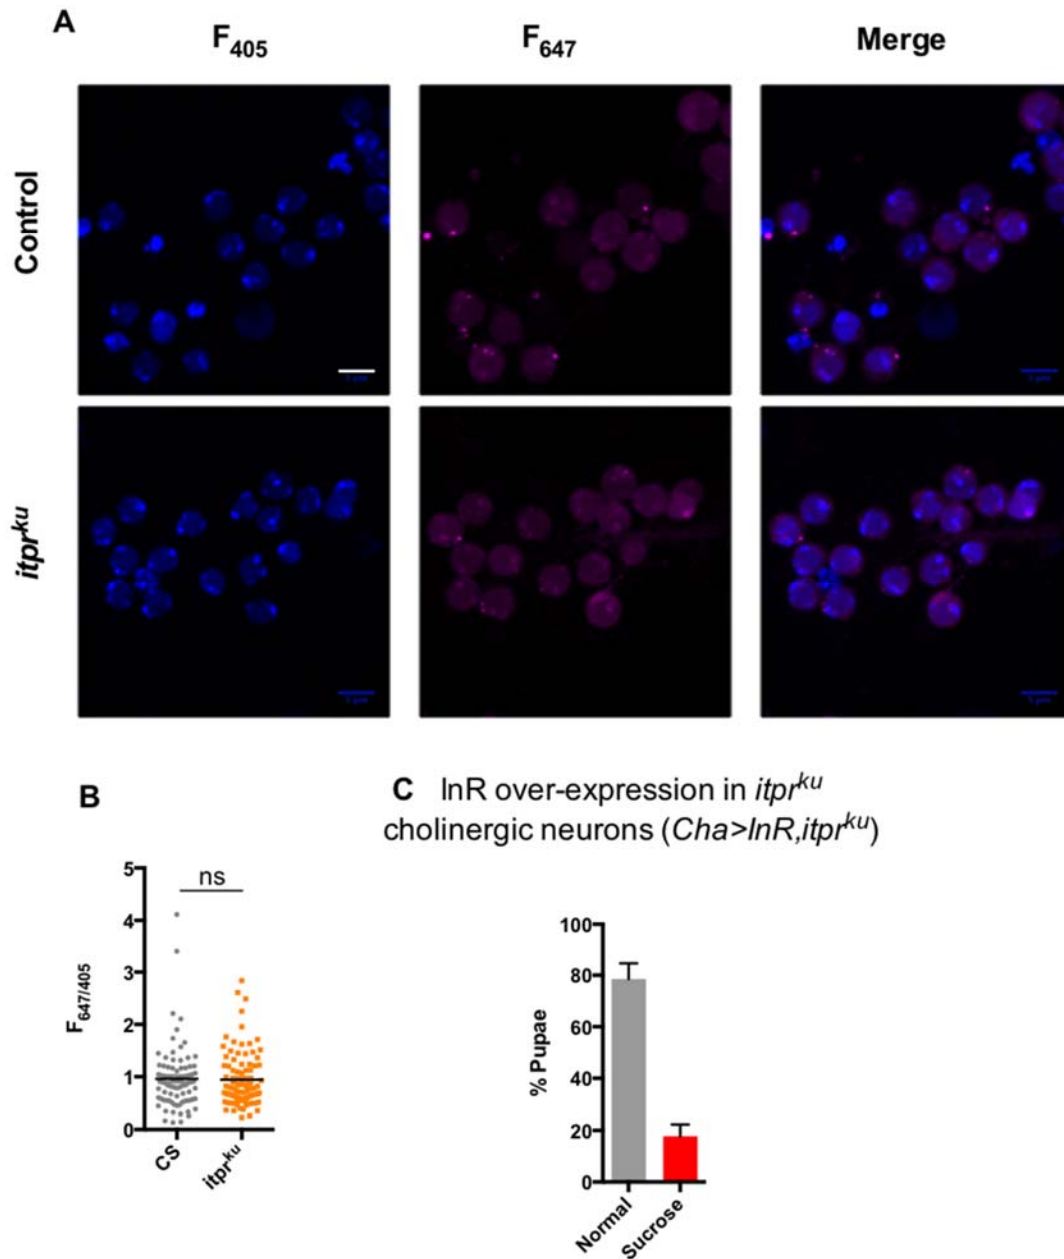

**Fig. S4 (A)** Representative confocal z-projection stack of primary neuronal cells in culture, treated with *in vivo* protein synthesis detection kit. Scale bar 5 $\mu$ m **(B)** Quantification of F<sub>647</sub> and F<sub>405</sub> from confocal images.  $n \geq 80$  Unpaired *t* test. **(C)** % pupation when 88h AEL *itpr<sup>ku</sup>* over-expressing InR in cholinergic neurons were transferred to normal or sucrose-only media.

Figure S5

Proposed Model in NE cells

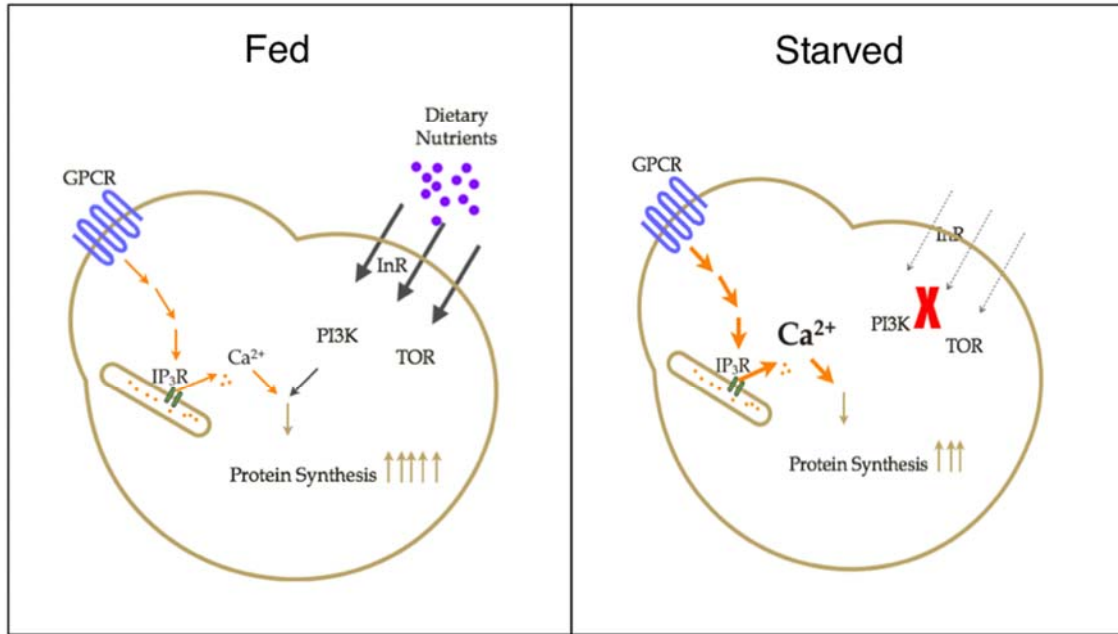

## Supplemental Experimental Procedure

### *Fly strains*

*Canton S* (CS) was used as the wild type control. The following strains were obtained from Bloomington Stock Centre: *UAS-InRRNAi* (#31594), *UAS-AktRNAi* (#33615), *UAS-TOR<sup>TE</sup>D* (#7013), *UAS-S6K<sup>KQ</sup>* (#6911), *UAS-Alk RNAi* (#27518), *UAS-Rheb RNAi* (#33966), *UAS-InR* (#8262), *UAS-Rheb* (#9689), *UAS-Akt1* (#8191), *UAS-S6K* (#6911), *Elav<sup>c155</sup>-GAL4* (#458), *Isp2-GAL4* (#27451), *ok72GAL4* (#6486), *UAS CAMKII* (#29662), *UAS dicer* (#24648),

The following were from Vienna Drosophila Research Centre stock collection: *UAS-itpr RNAi* (1063), *UAS-STIM RNAi* (47073)

The following were kind gifts: *phm:gfp-GAL4* (Michael O'Connor), *dimm<sup>c929</sup>-GAL4* (Paul H Taghert), *UAS-dmycp110<sup>CaaX</sup>* (Ernst Hafen), *UAS-eGFP* (Michael Rosbash), *UAS-Alk<sup>DN</sup>* (Manfred Frasch), *UAS-PTEN* (Bruce Edgar), *Cha-GAL4* (Toshihiro Kitamoto)

The following were generated in our laboratory: *itpr<sup>ka1091</sup>*, *itpr<sup>ug3</sup>*, *UAS-Orai<sup>E180A</sup>*, *UAS-itpr<sup>+</sup>*, *UAS-Stim*

### *RT-PCR primers*

#### *dilp2*

5' CCATGAGCAAGCCTTTGTCC 3'  
5' TTCACTGCAGAGCGTTCCTTG3'

#### *dilp3*

5' ACTCGACGTCTTCGGGATG3'  
5' CGAGGTTTACGTTCTCGGCT3'

#### *dilp5*

5' ACTCACTGTGCGAGCATTCCGG3'  
5' GAGTCGCAGTATGCCCTCAA3'

#### *dilp6*

5' TGGTTCTCAAAGTGCCGAC3'  
5' GAAATACATCGCCAAGGGC3'
